# Supplementary material for: Dielectric relaxations of polyether-based polyurethanes containing ionic liquids as antistatic agents
Source: Royal Society of Chemistry journal article supplement (doi:10.1039/c5cp04090f), 2015-12-08
Supplement: c5cp04090f1.pdf [file c5cp04090f1.pdf]

# Title: Dielectric relaxations of polyether-based polyurethanescontaining ionic liquids as antistatic agents

## Author names and affiliations:

A. Tsurumaki,<sup>a,b,c</sup> F. Bertasi,<sup>d</sup> K. Vezzù,<sup>d</sup> E. Negro,<sup>d</sup> V. Di Noto,<sup>d,e</sup> and H. Ohno<sup>a,b,c,\*</sup>

<sup>a</sup> Global Innovation Research Organization, Tokyo University of Agriculture and Technology, 2-24-16 Naka-cho, Koganei, Tokyo 184-8588, Japan.

<sup>b</sup> Department of Biotechnology, Tokyo University of Agriculture and Technology, 2-24-16 Naka-cho, Koganei, Tokyo 184-8588, Japan

<sup>c</sup> Functional Ionic Liquid Laboratories, Graduate School of Engineering, Tokyo University of Agriculture and Technology, Japan.

<sup>d</sup>Department of Chemical Sciences, University of Padova, Via Marzolo 1, 35131 Padova (PD), Italy.

<sup>e</sup>Department of Industrial Engineering, University of Padova, Via Gradenigo, 6/a - 35131 Padova (PD), Italy

\*Corresponding author: Prof. H. Ohno, Department of Biotechnology, Tokyo University of Agriculture and Technology, 2-24-16 Naka-cho, Koganei, Tokyo 184-8588, Japan. E-mail: [ohnoh@cc.tuat.ac.jp](mailto:ohnoh@cc.tuat.ac.jp); Tel: +81-42-388-7024; Fax: +81-42-388-7024

## *I(t)* vs. *t* profiles

The *I(t)* vs. *t* curves are obtained (Fig. S1), as reported elsewhere<sup>1</sup> by inverse Fourier transformation of the r.t. complex permittivity in the frequency-domain,  $\varepsilon^*(\omega)$ , using equation:

$$I(t) = C_0 V_0 \cdot \frac{1}{2\pi} \int_{-\infty}^{+\infty} \varepsilon^*(\omega) e^{i\omega t} d\omega = C_0 V_0 \cdot F^{-1}[\varepsilon^*(\omega)] \quad , \quad t > 0 \quad (\text{Eq. S1})$$

where  $C_0$  is the geometric capacitance of the sample,  $V_0$  is the height of the applied step voltage and  $\varepsilon^*(\omega)$  is the complex permittivity given by Eq. 3. in the text. In Fig. S1, the overall *I(t)* profiles of PU and PU-CF samples are compared with the contributions of electrode polarization and dielectric relaxation phenomena.

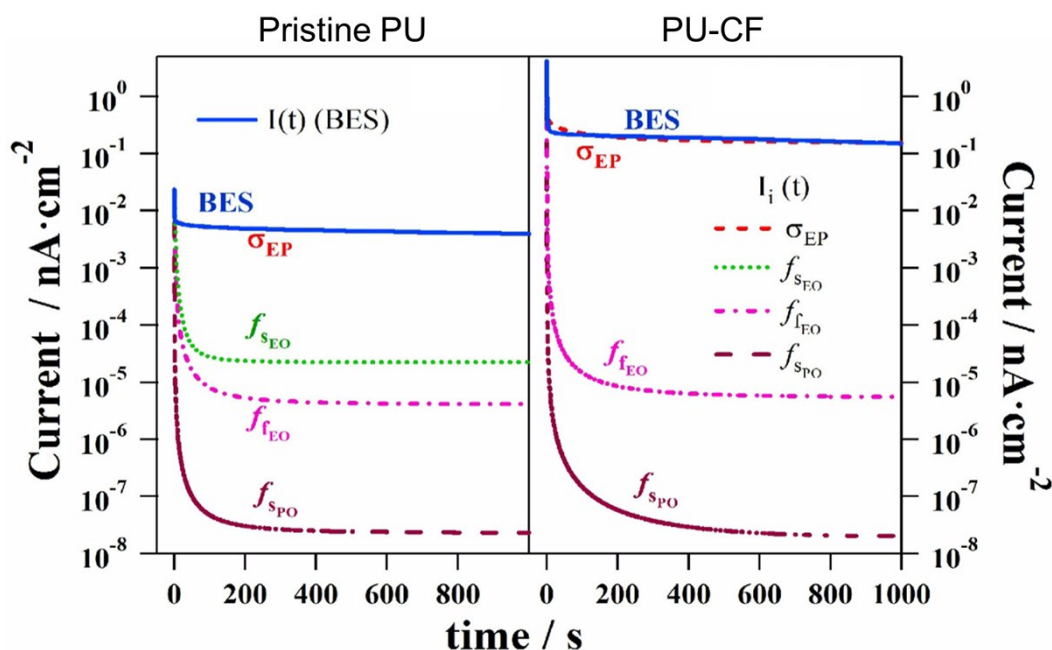

**Fig. S1.** Dependence on *t* of the profiles of overall *I(t)* (BES measurement), electrode polarization ( $I\sigma_{EP}(t)$ ) and dielectric relaxations ( $I_i(t)$ , with  $i = f_{sEO}, f_{fEO}$  and  $f_{sPO}$ ) for both PU and PU-CF samples. *I(t)* and  $I_i(t)$  are obtained by the inverse Fourier transform (Eq. S1) of the overall r.t. complex permittivity,  $\varepsilon^*(\omega)$ , (see Eq. 3 in the main text) and of each of its terms corresponding to the detected electric events, respectively.

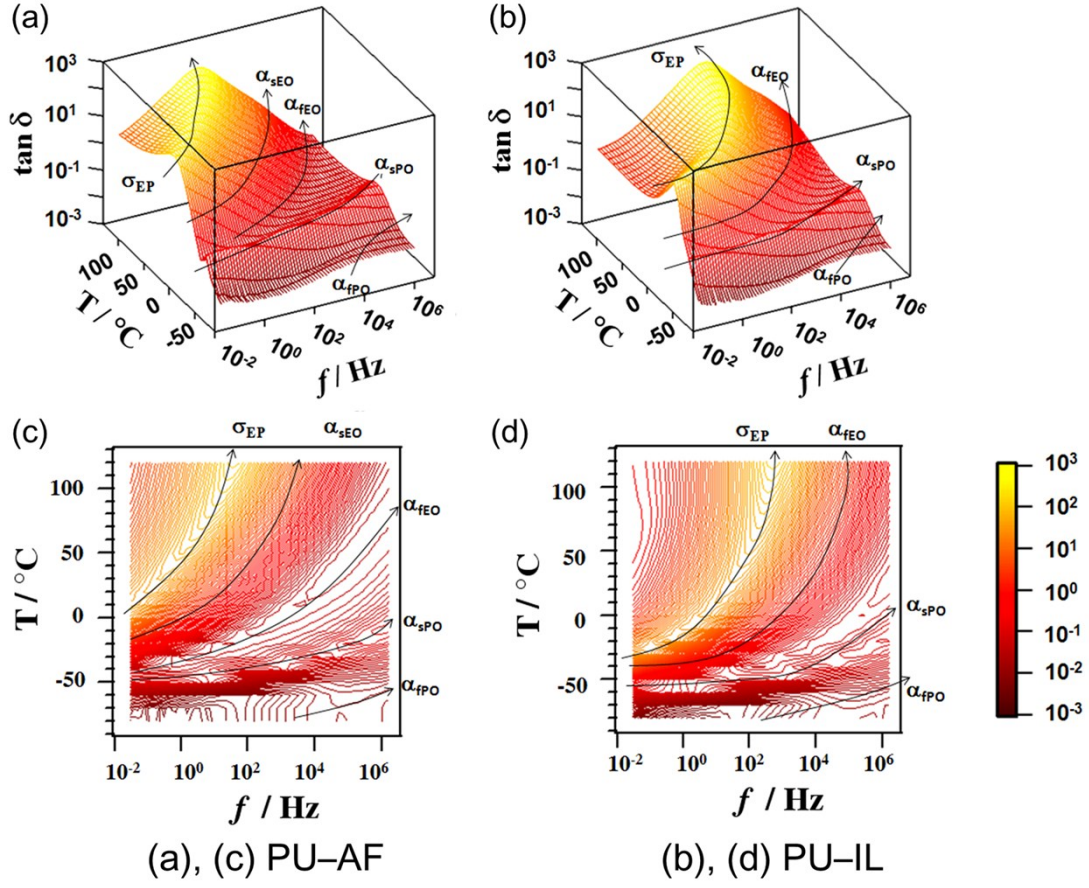

Fig. S2.  $\tan \delta$  vs. temperature and frequency in 3D (a, b) and contour map (c, d).

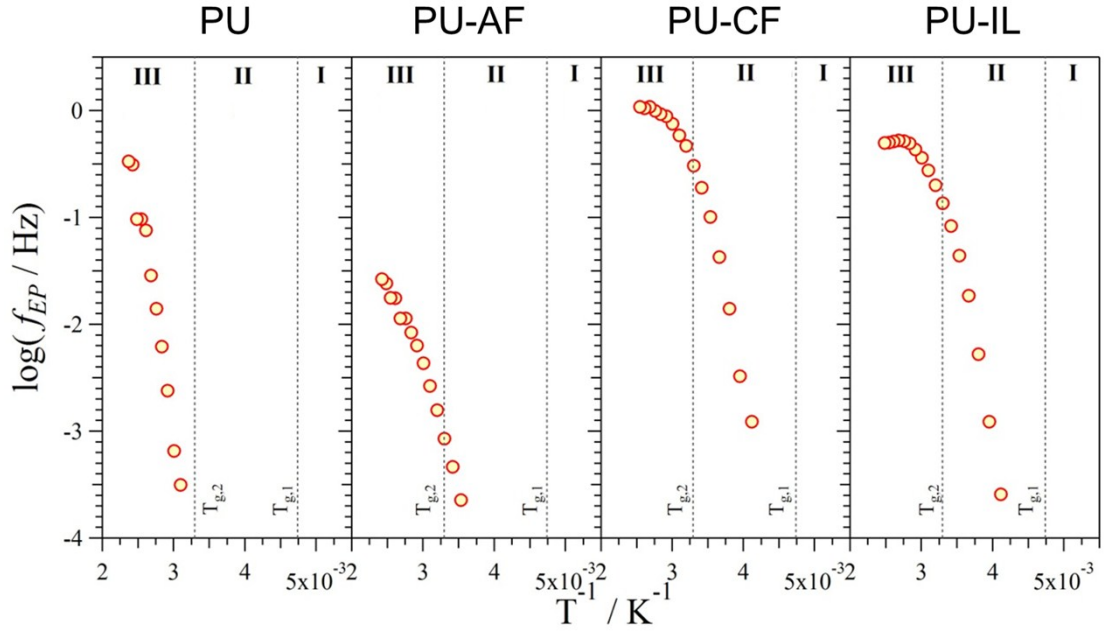

Fig. S3. Dependence of the fitted polarization frequencies ( $f_{EP}$ ) on temperature in the investigated films.  $f_{EP}$  is determined by Eq. 3. in the text.

## References

1. A. Schönhal, *Acta Polymerica*, 1991, **42**, 149.
